# Supplementary material for: SERS-based immunoassay of tumor marker VEGF using DNA aptamers and silica-encapsulated hollow gold nanospheres
Source: Royal Society of Chemistry journal article supplement (doi:10.1039/c2cp43155f), 2012-11-15
Supplement: c2cp43155f.pdf [file c2cp43155f.pdf]

## Supporting Information

# SERS-based immunoassay of tumor marker VEGF using DNA aptamers and silica-encapsulated hollow gold nanospheres

**Juhui Ko,<sup>a</sup> Sangyeop Lee,<sup>a</sup> Eun Kyu Lee,<sup>b</sup> Soo-Ik Chang,<sup>c</sup> Lingxin Chen,<sup>d</sup>  
Soo-Young Yoon,<sup>e,\*</sup> and Jaebum Choo<sup>a,\*</sup>**

<sup>a</sup>*Department of Bionano Engineering, Hanyang University, Ansan 426-791, South Korea,*

<sup>b</sup>*College of Bionanotechnology, Gacheon University, Sunghnam 461-701, South Korea,*

<sup>c</sup>*Department of Biochemistry, Chungbuk National University, Cheongjoo 361-763, South Korea*

<sup>d</sup>*Key Laboratory of Coastal Zone Environmental Processes, Yantai Institute of Coastal Zone Research, Chinese Academy of Sciences, Yantai 264003, China*

<sup>e</sup>*Department of Laboratory Medicine, Korea University College of Medicine, Ansan 425-707, South Korea*

Submitted to

***Physical Chemistry Chemical Physics***

**November 2012 (Revised)**

Type of Manuscript: Research Paper

(Special Issue on “Plasmonics and Spectroscopy”)

**\*Joint corresponding authors**

**Address for correspondence:**

**Jaebum Choo**

Telephone: +82-31-400-5201; Fax: +82-31-436-8188; E-mail: [jbchoo@hanyang.ac.kr](mailto:jbchoo@hanyang.ac.kr)

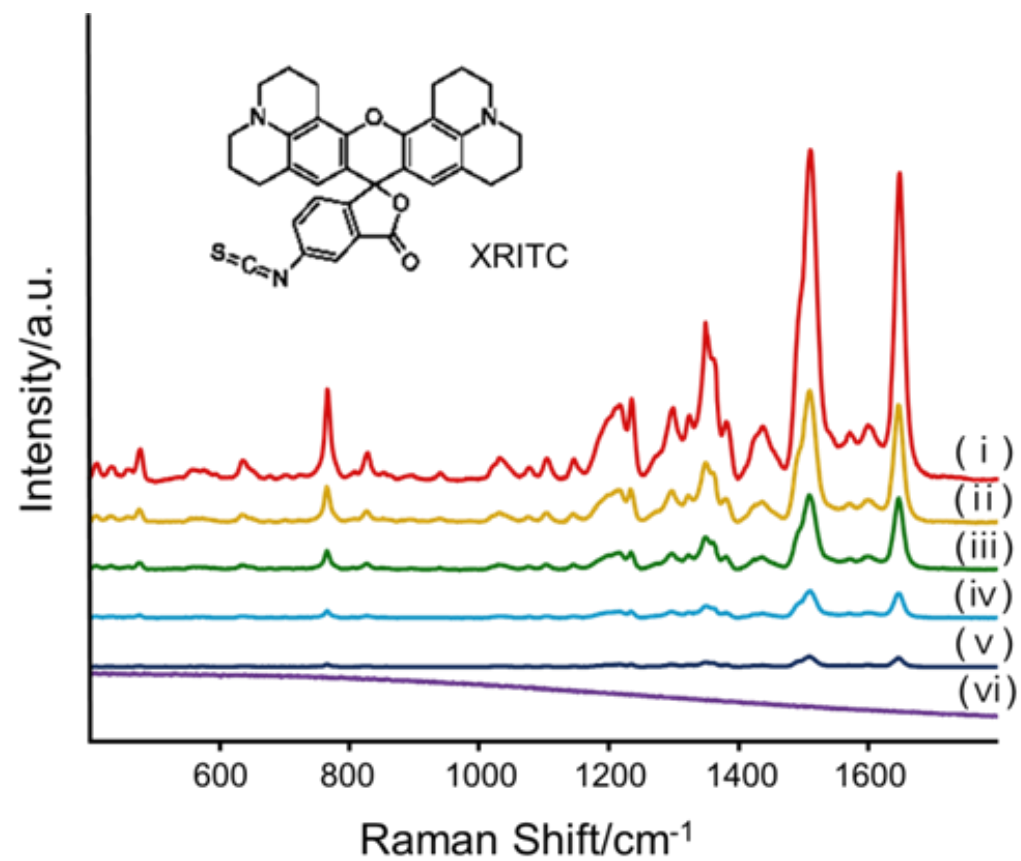

**Fig. S1** SERS spectra for decreasing concentrations of XRITC adsorbed on HGNs: (i) 500 nM, (ii) 200 nM, (iii) 100 nM, (iv) 50 nM, (v) 20 nM, and (vi) Raman spectrum of 2.0  $\mu$ M of free XRITC solution.

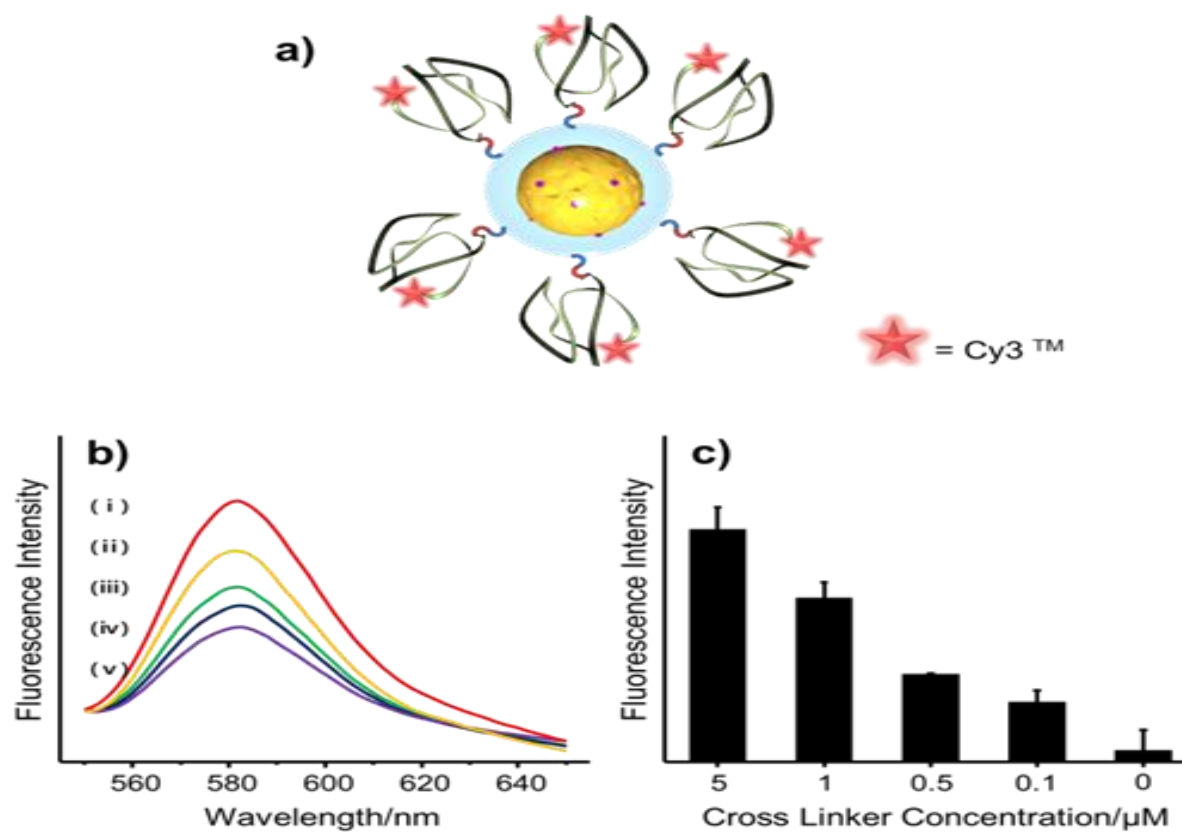

**Fig. S2** Evaluation of the loading density of (a) Cy3-labeled aptamer DNA-conjugated SEHGns, (b) fluorescence emission spectra for decreasing concentrations of sulfo-SMCC: (i) 5  $\mu\text{M}$ , (ii) 1  $\mu\text{M}$ , (iii) 0.5  $\mu\text{M}$ , (iv) 0.1  $\mu\text{M}$ , and (v) 0  $\mu\text{M}$ , and (c) the corresponding fluorescence intensity change at 585 nm. Error bars indicate standard deviations from 5 measurements.

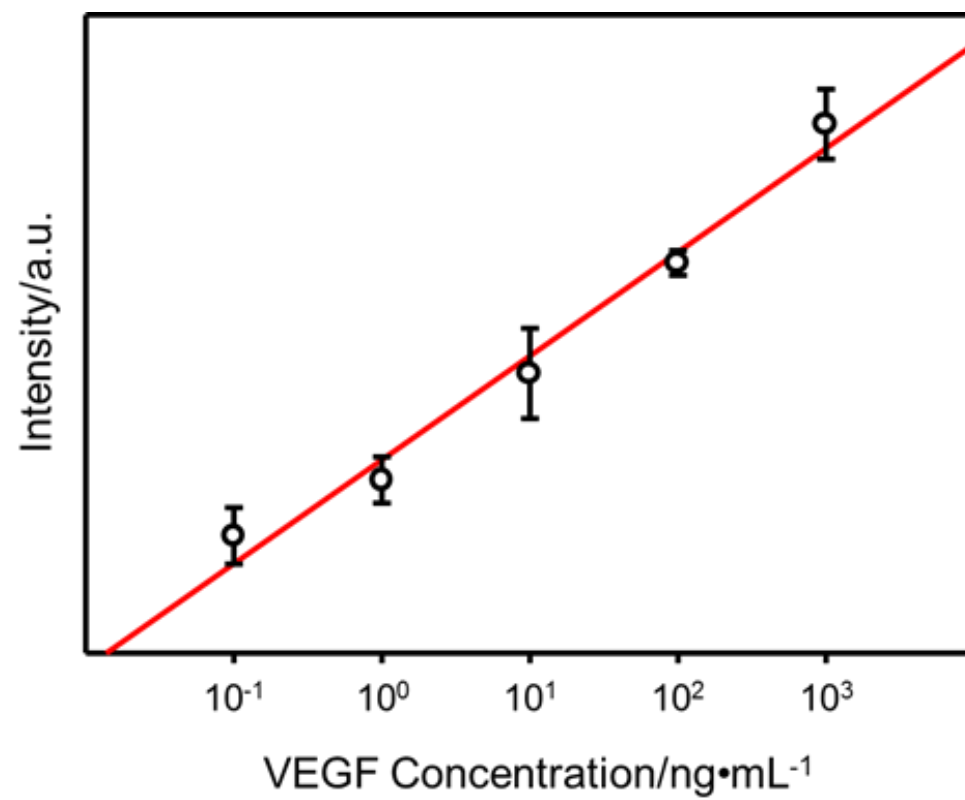

**Fig. S3** Calibration curve of the SERS signal at 1650 cm<sup>-1</sup> as a function of VEGF concentration in the higher concentration range from 0.1 to 1000 ng/mL.
